# Supplementary material for: Photocatalytic reactions under irradiation of visible light over gold nanoparticles supported on titanium(iv) oxide powder prepared by using a multi-step photodeposition method
Source: Royal Society of Chemistry journal article supplement (doi:10.1039/c4cy00042k), 2014-01-01
Supplement: c4cy00042k1.pdf [file c4cy00042k1.pdf]

Supplementary information for

**Photocatalytic reactions under irradiation of visible light over gold nanoparticles supported on titanium(IV) oxide powder prepared by using multi-step photodeposition method**

Atsuhiko Tanaka, Satoshi Sakaguchi, Keiji Hashimoto and Hiroshi Kominami\*

*Department of Applied Chemistry, Faculty of Science and Engineering, Kinki University,*

*Kowakae, Higashiosaka, Osaka 577-8502, Japan*

## Results and discussion

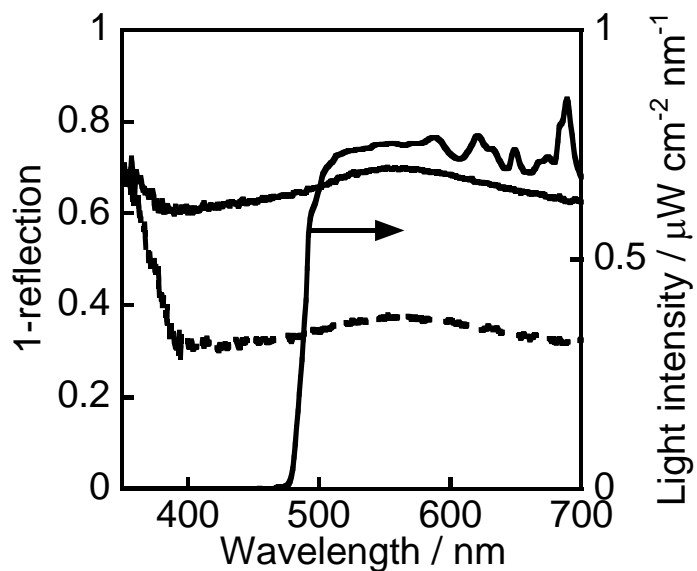

**Figure S1** Absorption spectra of Au(1.0×1)/TiO<sub>2</sub>(723) (broken line) and Au(0.25×4)/TiO<sub>2</sub>(723) (solid line), and intensity of visible light irradiated to reaction systems from a Xe lamp with a Y-48 filter (right axis).<sup>1)</sup>

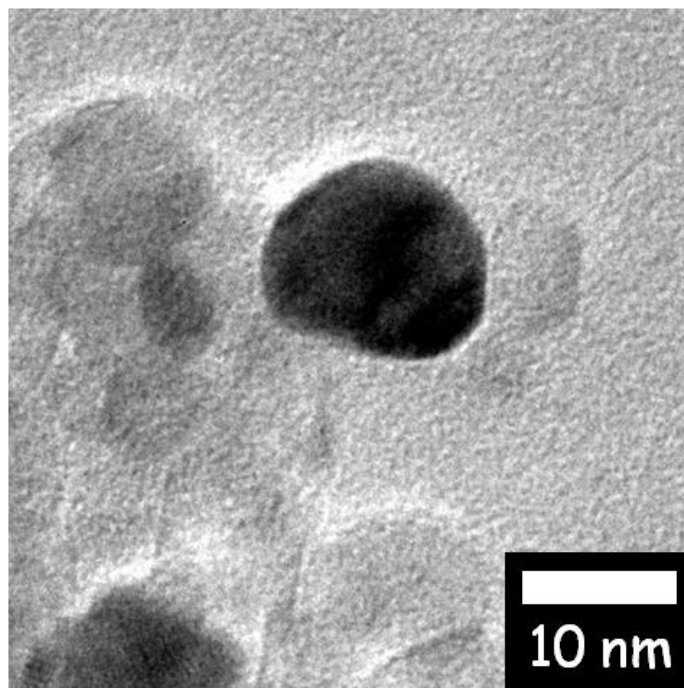

**Figure S2** TEM image of the sample obtained by post-calcination of Au(0.25×4)/TiO<sub>2</sub>(723) at 773 K.

### Reference

- 1) A. Tanaka, S. Sakaguchi, K. Hashimoto and H. Kominami, *Catal. Sci. Technol.*, 2012, **2**, 907.
